# Supplementary material for: VetCAST Method for Determination of the Pharmacokinetic-Pharmacodynamic Cut-Off Values of a Long-Acting Formulation of Florfenicol to Support Clinical Breakpoints for Florfenicol Antimicrobial Susceptibility Testing in Cattle
Source: PubMed Central journal article supplement (PMC6581757; doi:10.3389/fmicb.2019.01310), 2019-06-12
Supplement: Data_Sheet_1.pdf [file Data_Sheet_1.pdf]

Individual florfenicol raw data used for the population pharmacokinetic analysis

| Time h | Cobs ug/mL | ID | BLQ | MDV | Dose mg/kg |
|--------|------------|----|-----|-----|------------|
| 0      |            | 1  |     |     | 40         |
| 0      |            | 1  | 1   | 0   |            |
| 0.25   | 2.371      | 1  | 0   | 0   |            |
| 0.5    | 3.522      | 1  | 0   | 0   |            |
| 0.75   | 3.595      | 1  | 0   | 0   |            |
| 1      | 3.621      | 1  | 0   | 0   |            |
| 2      | 5.476      | 1  | 0   | 0   |            |
| 3      | 7.691      | 1  | 0   | 0   |            |
| 4      | 6.074      | 1  | 0   | 0   |            |
| 6      | 4.548      | 1  | 0   | 0   |            |
| 8      | 3.493      | 1  | 0   | 0   |            |
| 10     | 3.28       | 1  | 0   | 0   |            |
| 12     | 3.149      | 1  | 0   | 0   |            |
| 24     | 1.994      | 1  | 0   | 0   |            |
| 29     | 1.852      | 1  | 0   | 0   |            |
| 33     | 1.55       | 1  | 0   | 0   |            |
| 48     | 1.18       | 1  | 0   | 0   |            |
| 54     | 0.99       | 1  | 0   | 0   |            |
| 72     | 0.807      | 1  | 0   | 0   |            |
| 80     | 0.417      | 1  | 0   | 0   |            |
| 0      |            | 2  |     |     | 40         |
| 0      |            | 2  | 1   | 0   |            |
| 0.25   | 2.394      | 2  | 0   | 0   |            |
| 0.5    | 3.241      | 2  | 0   | 0   |            |
| 0.75   | 3.601      | 2  | 0   | 0   |            |
| 1      | 3.923      | 2  | 0   | 0   |            |
| 2      | 4.925      | 2  | 0   | 0   |            |
| 3      | 5.422      | 2  | 0   | 0   |            |
| 4      | 5.158      | 2  | 0   | 0   |            |
| 6      | 4.829      | 2  | 0   | 0   |            |
| 8      | 3.955      | 2  | 0   | 0   |            |
| 10     | 3.713      | 2  | 0   | 0   |            |
| 12     | 3.488      | 2  | 0   | 0   |            |
| 24     | 1.975      | 2  | 0   | 0   |            |
| 29     | 1.677      | 2  | 0   | 0   |            |
| 33     | 1.532      | 2  | 0   | 0   |            |
| 48     | 1.269      | 2  | 0   | 0   |            |
| 54     | 0.922      | 2  | 0   | 0   |            |
| 72     | 0.803      | 2  | 0   | 0   |            |
| 80     | 0.467      | 2  | 0   | 0   |            |
| 0      |            | 3  |     |     | 40         |
| 0      |            | 3  | 1   | 0   |            |
| 0.25   | 2.745      | 3  | 0   | 0   |            |
| 0.5    | 3.937      | 3  | 0   | 0   |            |
| 0.75   | 4.1        | 3  | 0   | 0   |            |
| 1      | 4.133      | 3  | 0   | 0   |            |
| 2      | 4.844      | 3  | 0   | 0   |            |
| 3      | 5.025      | 3  | 0   | 0   |            |
| 4      | 4.916      | 3  | 0   | 0   |            |
| 6      | 4.447      | 3  | 0   | 0   |            |
| 8      | 3.495      | 3  | 0   | 0   |            |

|      |       |   |   |   |    |
|------|-------|---|---|---|----|
| 10   | 3.32  | 3 | 0 | 0 |    |
| 12   | 3.048 | 3 | 0 | 0 |    |
| 24   | 2.126 | 3 | 0 | 0 |    |
| 29   | 1.73  | 3 | 0 | 0 |    |
| 33   | 1.455 | 3 | 0 | 0 |    |
| 48   | 1.219 | 3 | 0 | 0 |    |
| 54   | 0.864 | 3 | 0 | 0 |    |
| 72   | 0.767 | 3 | 0 | 0 |    |
| 80   | 0.462 | 3 | 0 | 0 |    |
| 0    |       | 4 |   |   | 40 |
| 0    |       | 4 | 1 | 0 |    |
| 0.25 | 3.043 | 4 | 0 | 0 |    |
| 0.5  | 3.027 | 4 | 0 | 0 |    |
| 0.75 | 4.733 | 4 | 0 | 0 |    |
| 1    | 4.93  | 4 | 0 | 0 |    |
| 2    | 5.274 | 4 | 0 | 0 |    |
| 3    | 5.634 | 4 | 0 | 0 |    |
| 4    | 4.987 | 4 | 0 | 0 |    |
| 6    | 4.682 | 4 | 0 | 0 |    |
| 8    | 4.553 | 4 | 0 | 0 |    |
| 10   | 4.359 | 4 | 0 | 0 |    |
| 12   | 4.025 | 4 | 0 | 0 |    |
| 24   | 2.582 | 4 | 0 | 0 |    |
| 29   | 2.433 | 4 | 0 | 0 |    |
| 33   | 2.242 | 4 | 0 | 0 |    |
| 48   | 1.707 | 4 | 0 | 0 |    |
| 54   | 1.01  | 4 | 0 | 0 |    |
| 72   | 0.775 | 4 | 0 | 0 |    |
| 80   | 0.679 | 4 | 0 | 0 |    |
| 0    |       | 5 |   |   | 40 |
| 0    |       | 5 | 1 | 0 |    |
| 0.25 | 2.023 | 5 | 0 | 0 |    |
| 0.5  | 2.734 | 5 | 0 | 0 |    |
| 0.75 | 3.696 | 5 | 0 | 0 |    |
| 1    | 3.788 | 5 | 0 | 0 |    |
| 2    | 5.87  | 5 | 0 | 0 |    |
| 3    | 5.914 | 5 | 0 | 0 |    |
| 4    | 4.953 | 5 | 0 | 0 |    |
| 6    | 4.68  | 5 | 0 | 0 |    |
| 8    | 4.013 | 5 | 0 | 0 |    |
| 10   | 3.767 | 5 | 0 | 0 |    |
| 12   | 3.092 | 5 | 0 | 0 |    |
| 24   | 1.94  | 5 | 0 | 0 |    |
| 29   | 1.919 | 5 | 0 | 0 |    |
| 33   | 1.841 | 5 | 0 | 0 |    |
| 48   | 1.415 | 5 | 0 | 0 |    |
| 54   | 0.949 | 5 | 0 | 0 |    |
| 72   | 0.587 | 5 | 0 | 0 |    |
| 80   | 0.456 | 5 | 0 | 0 |    |
| 0    |       | 6 |   |   | 40 |
| 0    |       | 6 | 1 | 0 |    |
| 0.25 | 2.534 | 6 | 0 | 0 |    |
| 0.5  | 3.783 | 6 | 0 | 0 |    |

|      |       |   |   |   |    |
|------|-------|---|---|---|----|
| 0.75 | 4.481 | 6 | 0 | 0 |    |
| 1    | 4.545 | 6 | 0 | 0 |    |
| 2    | 5.431 | 6 | 0 | 0 |    |
| 3    | 6.51  | 6 | 0 | 0 |    |
| 4    | 6.019 | 6 | 0 | 0 |    |
| 6    | 5.55  | 6 | 0 | 0 |    |
| 8    | 5.223 | 6 | 0 | 0 |    |
| 10   | 4.694 | 6 | 0 | 0 |    |
| 12   | 4.492 | 6 | 0 | 0 |    |
| 24   | 2.558 | 6 | 0 | 0 |    |
| 29   | 2.264 | 6 | 0 | 0 |    |
| 33   | 2.04  | 6 | 0 | 0 |    |
| 48   | 1.735 | 6 | 0 | 0 |    |
| 54   | 0.966 | 6 | 0 | 0 |    |
| 72   | 0.489 | 6 | 0 | 0 |    |
| 80   |       | 6 | 0 | 1 |    |
| 0    |       | 7 |   |   | 40 |
| 0    |       | 7 | 1 | 0 |    |
| 0.25 | 3.354 | 7 | 0 | 0 |    |
| 0.5  | 3.9   | 7 | 0 | 0 |    |
| 0.75 | 4.547 | 7 | 0 | 0 |    |
| 1    | 4.599 | 7 | 0 | 0 |    |
| 2    | 5.881 | 7 | 0 | 0 |    |
| 3    | 6.245 | 7 | 0 | 0 |    |
| 4    | 5.518 | 7 | 0 | 0 |    |
| 6    | 4.941 | 7 | 0 | 0 |    |
| 8    | 4.574 | 7 | 0 | 0 |    |
| 10   | 4.239 | 7 | 0 | 0 |    |
| 12   | 3.659 | 7 | 0 | 0 |    |
| 24   | 2.136 | 7 | 0 | 0 |    |
| 29   | 1.929 | 7 | 0 | 0 |    |
| 33   | 1.882 | 7 | 0 | 0 |    |
| 48   | 1.202 | 7 | 0 | 0 |    |
| 54   | 0.972 | 7 | 0 | 0 |    |
| 72   | 0.705 | 7 | 0 | 0 |    |
| 80   | 0.658 | 7 | 0 | 0 |    |
| 0    |       | 8 |   |   | 40 |
| 0    |       | 8 | 1 | 0 |    |
| 0.25 | 2.385 | 8 | 0 | 0 |    |
| 0.5  | 3.262 | 8 | 0 | 0 |    |
| 0.75 | 4.094 | 8 | 0 | 0 |    |
| 1    | 4.338 | 8 | 0 | 0 |    |
| 2    | 5.143 | 8 | 0 | 0 |    |
| 3    | 5.377 | 8 | 0 | 0 |    |
| 4    | 5.497 | 8 | 0 | 0 |    |
| 6    | 5.168 | 8 | 0 | 0 |    |
| 8    | 4.719 | 8 | 0 | 0 |    |
| 10   | 4.325 | 8 | 0 | 0 |    |
| 12   | 4.194 | 8 | 0 | 0 |    |
| 24   | 2.487 | 8 | 0 | 0 |    |
| 29   | 2.251 | 8 | 0 | 0 |    |
| 33   | 2.092 | 8 | 0 | 0 |    |
| 48   | 1.475 | 8 | 0 | 0 |    |

|      |       |    |   |   |    |
|------|-------|----|---|---|----|
| 54   | 0.898 | 8  | 0 | 0 |    |
| 72   | 0.748 | 8  | 0 | 0 |    |
| 80   | 0.645 | 8  | 0 | 0 |    |
| 0    |       | 9  |   |   | 40 |
| 0    |       | 9  | 1 | 0 |    |
| 0.25 | 1.909 | 9  | 0 | 0 |    |
| 0.5  | 2.167 | 9  | 0 | 0 |    |
| 0.75 | 2.384 | 9  | 0 | 0 |    |
| 1    | 2.504 | 9  | 0 | 0 |    |
| 2    | 4.011 | 9  | 0 | 0 |    |
| 3    | 4.262 | 9  | 0 | 0 |    |
| 4    | 3.885 | 9  | 0 | 0 |    |
| 6    | 3.404 | 9  | 0 | 0 |    |
| 8    | 2.812 | 9  | 0 | 0 |    |
| 10   | 2.72  | 9  | 0 | 0 |    |
| 12   | 2.51  | 9  | 0 | 0 |    |
| 24   | 1.877 | 9  | 0 | 0 |    |
| 29   | 1.641 | 9  | 0 | 0 |    |
| 33   | 1.361 | 9  | 0 | 0 |    |
| 48   | 1.147 | 9  | 0 | 0 |    |
| 54   | 0.756 | 9  | 0 | 0 |    |
| 72   | 0.672 | 9  | 0 | 0 |    |
| 80   | 0.552 | 9  | 0 | 0 |    |
| 0    |       | 10 |   |   | 40 |
| 0    |       | 10 | 1 | 0 |    |
| 0.25 | 5.095 | 10 | 0 | 0 |    |
| 0.5  | 5.925 | 10 | 0 | 0 |    |
| 0.75 | 8.58  | 10 | 0 | 0 |    |
| 1    | 8.652 | 10 | 0 | 0 |    |
| 2    | 9.786 | 10 | 0 | 0 |    |
| 3    | 8.606 | 10 | 0 | 0 |    |
| 4    | 7.642 | 10 | 0 | 0 |    |
| 6    | 6.248 | 10 | 0 | 0 |    |
| 8    | 4.99  | 10 | 0 | 0 |    |
| 10   | 3.146 | 10 | 0 | 0 |    |
| 12   | 2.63  | 10 | 0 | 0 |    |
| 24   | 2.083 | 10 | 0 | 0 |    |
| 29   | 1.828 | 10 | 0 | 0 |    |
| 33   | 1.736 | 10 | 0 | 0 |    |
| 48   | 1.118 | 10 | 0 | 0 |    |
| 54   | 0.855 | 10 | 0 | 0 |    |
| 72   | 0.625 | 10 | 0 | 0 |    |
| 80   | 0.356 | 10 | 0 | 0 |    |
| 0    |       | 11 |   |   | 40 |
| 0    |       | 11 | 1 | 0 |    |
| 0.25 | 1.19  | 11 | 0 | 0 |    |
| 0.5  | 1.77  | 11 | 0 | 0 |    |
| 1    | 2.62  | 11 | 0 | 0 |    |
| 2    | 4.08  | 11 | 0 | 0 |    |
| 3    | 4.46  | 11 | 0 | 0 |    |
| 4    | 4.49  | 11 | 0 | 0 |    |
| 5    | 3.88  | 11 | 0 | 0 |    |
| 6    | 4.45  | 11 | 0 | 0 |    |

|      |        |    |   |   |    |
|------|--------|----|---|---|----|
| 7    | 4.05   | 11 | 0 | 0 |    |
| 8    | 3.86   | 11 | 0 | 0 |    |
| 9    | 3.75   | 11 | 0 | 0 |    |
| 10   | 3.76   | 11 | 0 | 0 |    |
| 12   | 3.45   | 11 | 0 | 0 |    |
| 24   | 2.27   | 11 | 0 | 0 |    |
| 29   | 2.14   | 11 | 0 | 0 |    |
| 34   | 1.97   | 11 | 0 | 0 |    |
| 48   | 1.26   | 11 | 0 | 0 |    |
| 72   | 0.714  | 11 | 0 | 0 |    |
| 96   | 0.455  | 11 | 0 | 0 |    |
| 120  | 0.328  | 11 | 0 | 0 |    |
| 144  | 0.224  | 11 | 0 | 0 |    |
| 168  | 0.182  | 11 | 0 | 0 |    |
| 192  |        | 11 | 1 | 0 |    |
| 216  | 0.183  | 11 | 0 | 0 |    |
| 0    |        | 12 |   |   | 40 |
| 0    |        | 12 | 1 | 0 |    |
| 0.25 | 1.92   | 12 | 0 | 0 |    |
| 0.5  | 3.14   | 12 | 0 | 0 |    |
| 1    | 4.15   | 12 | 0 | 0 |    |
| 2    | 4.75   | 12 | 0 | 0 |    |
| 3    | 5.41   | 12 | 0 | 0 |    |
| 4    | 5.28   | 12 | 0 | 0 |    |
| 5    | 6.03   | 12 | 0 | 0 |    |
| 6    | 5.71   | 12 | 0 | 0 |    |
| 7    | 6.17   | 12 | 0 | 0 |    |
| 8    | 6.42   | 12 | 0 | 0 |    |
| 9    | 5.98   | 12 | 0 | 0 |    |
| 10   | 6.22   | 12 | 0 | 0 |    |
| 12   | 5.63   | 12 | 0 | 0 |    |
| 24   | 3.18   | 12 | 0 | 0 |    |
| 29   | 2.23   | 12 | 0 | 0 |    |
| 34   | 1.71   | 12 | 0 | 0 |    |
| 48   | 1.08   | 12 | 0 | 0 |    |
| 72   | 0.469  | 12 | 0 | 0 |    |
| 96   | 0.233  | 12 | 0 | 0 |    |
| 120  | 0.11   | 12 | 0 | 0 |    |
| 144  | 0.0528 | 12 | 0 | 0 |    |
| 168  |        | 12 | 1 | 0 |    |
| 192  |        | 12 | 1 | 0 |    |
| 216  |        | 12 | 1 | 0 |    |
| 0    |        | 13 |   |   | 40 |
| 0    |        | 13 | 1 | 0 |    |
| 0.25 | 1.01   | 13 | 0 | 0 |    |
| 0.5  | 1.45   | 13 | 0 | 0 |    |
| 1    | 2.28   | 13 | 0 | 0 |    |
| 2    | 3.02   | 13 | 0 | 0 |    |
| 3    | 3.45   | 13 | 0 | 0 |    |
| 4    | 3.46   | 13 | 0 | 0 |    |
| 5    | 3.33   | 13 | 0 | 0 |    |
| 6    | 3.25   | 13 | 0 | 0 |    |
| 7    | 3.18   | 13 | 0 | 0 |    |

|      |       |    |   |   |    |
|------|-------|----|---|---|----|
| 8    | 3.11  | 13 | 0 | 0 |    |
| 9    | 3.05  | 13 | 0 | 0 |    |
| 10   | 2.99  | 13 | 0 | 0 |    |
| 12   | 2.53  | 13 | 0 | 0 |    |
| 24   | 1.73  | 13 | 0 | 0 |    |
| 29   | 1.43  | 13 | 0 | 0 |    |
| 34   | 1.28  | 13 | 0 | 0 |    |
| 48   | 0.996 | 13 | 0 | 0 |    |
| 72   | 0.71  | 13 | 0 | 0 |    |
| 96   | 0.444 | 13 | 0 | 0 |    |
| 120  | 0.397 | 13 | 0 | 0 |    |
| 144  | 0.356 | 13 | 0 | 0 |    |
| 168  | 0.307 | 13 | 0 | 0 |    |
| 192  | 0.279 | 13 | 0 | 0 |    |
| 216  | 0.263 | 13 | 0 | 0 |    |
| 0    |       | 14 |   |   | 40 |
| 0    |       | 14 | 1 | 0 |    |
| 0.25 | 1.1   | 14 | 0 | 0 |    |
| 0.5  | 1.84  | 14 | 0 | 0 |    |
| 1    | 2.85  | 14 | 0 | 0 |    |
| 2    | 3.64  | 14 | 0 | 0 |    |
| 3    | 4.17  | 14 | 0 | 0 |    |
| 4    | 4.34  | 14 | 0 | 0 |    |
| 5    | 4.38  | 14 | 0 | 0 |    |
| 6    | 4.22  | 14 | 0 | 0 |    |
| 7    | 4.11  | 14 | 0 | 0 |    |
| 8    | 4.02  | 14 | 0 | 0 |    |
| 9    | 3.85  | 14 | 0 | 0 |    |
| 10   | 3.66  | 14 | 0 | 0 |    |
| 12   | 3.3   | 14 | 0 | 0 |    |
| 24   | 2.19  | 14 | 0 | 0 |    |
| 29   | 1.79  | 14 | 0 | 0 |    |
| 34   | 1.57  | 14 | 0 | 0 |    |
| 48   | 1.02  | 14 | 0 | 0 |    |
| 72   | 0.493 | 14 | 0 | 0 |    |
| 96   | 0.302 | 14 | 0 | 0 |    |
| 120  | 0.232 | 14 | 0 | 0 |    |
| 144  | 0.181 | 14 | 0 | 0 |    |
| 168  | 0.15  | 14 | 0 | 0 |    |
| 192  | 0.139 | 14 | 0 | 0 |    |
| 216  | 0.12  | 14 | 0 | 0 |    |
| 0    |       | 15 |   |   | 40 |
| 0    |       | 15 | 1 | 0 |    |
| 0.25 | 1.32  | 15 | 0 | 0 |    |
| 0.5  | 2.05  | 15 | 0 | 0 |    |
| 1    | 3.1   | 15 | 0 | 0 |    |
| 2    | 4.32  | 15 | 0 | 0 |    |
| 3    | 4.68  | 15 | 0 | 0 |    |
| 4    | 4.75  | 15 | 0 | 0 |    |
| 5    | 4.76  | 15 | 0 | 0 |    |
| 6    | 5.12  | 15 | 0 | 0 |    |
| 7    | 4.55  | 15 | 0 | 0 |    |
| 8    | 4.75  | 15 | 0 | 0 |    |

|      |        |    |   |   |    |
|------|--------|----|---|---|----|
| 9    | 4.54   | 15 | 0 | 0 |    |
| 10   | 4.23   | 15 | 0 | 0 |    |
| 12   | 4.17   | 15 | 0 | 0 |    |
| 24   | 2.71   | 15 | 0 | 0 |    |
| 29   | 2.24   | 15 | 0 | 0 |    |
| 34   | 2.01   | 15 | 0 | 0 |    |
| 48   | 1.34   | 15 | 0 | 0 |    |
| 72   | 0.664  | 15 | 0 | 0 |    |
| 96   | 0.387  | 15 | 0 | 0 |    |
| 120  | 0.268  | 15 | 0 | 0 |    |
| 144  | 0.172  | 15 | 0 | 0 |    |
| 168  | 0.116  | 15 | 0 | 0 |    |
| 192  | 0.0645 | 15 | 0 | 0 |    |
| 216  |        | 15 | 1 | 0 |    |
| 0    |        | 16 |   |   | 40 |
| 0    |        | 16 | 1 | 0 |    |
| 0.25 | 0.66   | 16 | 0 | 0 |    |
| 0.5  | 1.12   | 16 | 0 | 0 |    |
| 1    | 1.67   | 16 | 0 | 0 |    |
| 2    | 2.2    | 16 | 0 | 0 |    |
| 3    | 2.45   | 16 | 0 | 0 |    |
| 4    | 2.58   | 16 | 0 | 0 |    |
| 5    | 2.57   | 16 | 0 | 0 |    |
| 6    | 2.58   | 16 | 0 | 0 |    |
| 7    | 2.58   | 16 | 0 | 0 |    |
| 8    | 2.44   | 16 | 0 | 0 |    |
| 9    | 2.23   | 16 | 0 | 0 |    |
| 10   | 2.31   | 16 | 0 | 0 |    |
| 12   | 2.13   | 16 | 0 | 0 |    |
| 24   | 1.94   | 16 | 0 | 0 |    |
| 29   | 1.63   | 16 | 0 | 0 |    |
| 34   | 1.46   | 16 | 0 | 0 |    |
| 48   | 1.17   | 16 | 0 | 0 |    |
| 72   | 0.687  | 16 | 0 | 0 |    |
| 96   | 0.472  | 16 | 0 | 0 |    |
| 120  | 0.387  | 16 | 0 | 0 |    |
| 144  | 0.277  | 16 | 0 | 0 |    |
| 168  | 0.205  | 16 | 0 | 0 |    |
| 192  | 0.16   | 16 | 0 | 0 |    |
| 216  | 0.123  | 16 | 0 | 0 |    |
| 0    |        | 17 |   |   | 40 |
| 0    |        | 17 | 1 | 0 |    |
| 0.25 | 0.883  | 17 | 0 | 0 |    |
| 0.5  | 1.45   | 17 | 0 | 0 |    |
| 1    | 2.45   | 17 | 0 | 0 |    |
| 2    | 3.61   | 17 | 0 | 0 |    |
| 3    | 3.82   | 17 | 0 | 0 |    |
| 4    | 3.57   | 17 | 0 | 0 |    |
| 5    | 3.52   | 17 | 0 | 0 |    |
| 6    | 2.59   | 17 | 0 | 0 |    |
| 7    |        | 17 | 1 | 1 |    |
| 8    | 3.66   | 17 | 0 | 0 |    |
| 9    | 3.35   | 17 | 0 | 0 |    |

|      |       |    |   |   |    |
|------|-------|----|---|---|----|
| 10   | 3.54  | 17 | 0 | 0 |    |
| 12   | 3.26  | 17 | 0 | 0 |    |
| 24   |       | 17 | 1 | 0 |    |
| 29   | 2.37  | 17 | 0 | 0 |    |
| 34   | 1.89  | 17 | 0 | 0 |    |
| 48   | 1.29  | 17 | 0 | 0 |    |
| 72   | 0.803 | 17 | 0 | 0 |    |
| 96   | 0.455 | 17 | 0 | 0 |    |
| 120  | 0.362 | 17 | 0 | 0 |    |
| 144  | 0.287 | 17 | 0 | 0 |    |
| 168  | 0.23  | 17 | 0 | 0 |    |
| 192  | 0.168 | 17 | 0 | 0 |    |
| 216  | 0.149 | 17 | 0 | 0 |    |
| 0    |       | 18 |   |   | 40 |
| 0    |       | 18 | 1 | 0 |    |
| 0.25 | 1.37  | 18 | 0 | 0 |    |
| 0.5  | 1.9   | 18 | 0 | 0 |    |
| 1    | 2.8   | 18 | 0 | 0 |    |
| 2    | 3.78  | 18 | 0 | 0 |    |
| 3    | 4     | 18 | 0 | 0 |    |
| 4    | 4.15  | 18 | 0 | 0 |    |
| 5    | 3.95  | 18 | 0 | 0 |    |
| 6    | 3.91  | 18 | 0 | 0 |    |
| 7    | 3.73  | 18 | 0 | 0 |    |
| 8    | 3.74  | 18 | 0 | 0 |    |
| 9    | 3.57  | 18 | 0 | 0 |    |
| 10   | 3.39  | 18 | 0 | 0 |    |
| 12   | 3.12  | 18 | 0 | 0 |    |
| 24   | 1.97  | 18 | 0 | 0 |    |
| 29   | 1.63  | 18 | 0 | 0 |    |
| 34   | 1.4   | 18 | 0 | 0 |    |
| 48   | 1.07  | 18 | 0 | 0 |    |
| 72   | 0.759 | 18 | 0 | 0 |    |
| 96   | 0.648 | 18 | 0 | 0 |    |
| 120  | 0.52  | 18 | 0 | 0 |    |
| 144  | 0.457 | 18 | 0 | 0 |    |
| 168  | 0.385 | 18 | 0 | 0 |    |
| 192  | 0.295 | 18 | 0 | 0 |    |
| 216  | 0.246 | 18 | 0 | 0 |    |
| 0    |       | 19 |   |   | 40 |
| 0    |       | 19 | 1 | 0 |    |
| 2    | 3.52  | 19 | 0 | 0 |    |
| 3    | 4.6   | 19 | 0 | 0 |    |
| 4    | 4.86  | 19 | 0 | 0 |    |
| 5    | 4.78  | 19 | 0 | 0 |    |
| 6    | 4.34  | 19 | 0 | 0 |    |
| 9    | 3.25  | 19 | 0 | 0 |    |
| 12   | 3.84  | 19 | 0 | 0 |    |
| 24   | 1.95  | 19 | 0 | 0 |    |
| 30   | 1.77  | 19 | 0 | 0 |    |
| 48   | 1.01  | 19 | 0 | 0 |    |
| 72   | 0.692 | 19 | 0 | 0 |    |
| 96   | 0.417 | 19 | 0 | 0 |    |



|     |        |    |   |   |    |
|-----|--------|----|---|---|----|
| 168 | 0.219  | 19 | 0 | 0 |    |
| 192 | 0.167  | 19 | 0 | 0 |    |
| 0   |        | 20 |   |   | 40 |
| 0   |        | 20 | 1 | 0 |    |
| 2   | 4.51   | 20 | 0 | 0 |    |
| 3   | 5.11   | 20 | 0 | 0 |    |
| 4   | 5.21   | 20 | 0 | 0 |    |
| 5   | 6      | 20 | 0 | 0 |    |
| 6   | 5.04   | 20 | 0 | 0 |    |
| 9   | 4.28   | 20 | 0 | 0 |    |
| 12  | 4.15   | 20 | 0 | 0 |    |
| 24  | 3.04   | 20 | 0 | 0 |    |
| 30  | 1.75   | 20 | 0 | 0 |    |
| 48  | 0.81   | 20 | 0 | 0 |    |
| 72  | 0.572  | 20 | 0 | 0 |    |
| 96  | 0.339  | 20 | 0 | 0 |    |
| 168 | 0.0927 | 20 | 0 | 0 |    |
| 192 | 0.0558 | 20 | 0 | 0 |    |
| 0   |        | 21 |   |   | 40 |
| 0   |        | 21 | 1 | 0 |    |
| 2   | 3.32   | 21 | 0 | 0 |    |
| 3   | 3.26   | 21 | 0 | 0 |    |
| 4   | 3.16   | 21 | 0 | 0 |    |
| 5   | 3.66   | 21 | 0 | 0 |    |
| 6   | 3.49   | 21 | 0 | 0 |    |
| 9   | 3.51   | 21 | 0 | 0 |    |
| 12  | 3.5    | 21 | 0 | 0 |    |
| 24  | 1.97   | 21 | 0 | 0 |    |
| 30  | 1.66   | 21 | 0 | 0 |    |
| 48  | 0.935  | 21 | 0 | 0 |    |
| 72  | 0.574  | 21 | 0 | 0 |    |
| 96  | 0.277  | 21 | 0 | 0 |    |
| 168 | 0.0827 | 21 | 0 | 0 |    |
| 192 |        | 21 | 1 | 0 |    |
| 0   |        | 22 |   |   | 40 |
| 0   |        | 22 | 1 | 0 |    |
| 2   | 3.98   | 22 | 0 | 0 |    |
| 3   | 4.07   | 22 | 0 | 0 |    |
| 4   | 4.05   | 22 | 0 | 0 |    |
| 5   | 4.53   | 22 | 0 | 0 |    |
| 6   | 5.18   | 22 | 0 | 0 |    |
| 9   | 4.13   | 22 | 0 | 0 |    |
| 12  | 5.82   | 22 | 0 | 0 |    |
| 24  | 2.06   | 22 | 0 | 0 |    |
| 30  | 2.21   | 22 | 0 | 0 |    |
| 48  | 1.07   | 22 | 0 | 0 |    |
| 72  | 0.536  | 22 | 0 | 0 |    |
| 96  | 0.382  | 22 | 0 | 0 |    |
| 168 | 0.065  | 22 | 0 | 0 |    |
| 192 | 0.0516 | 22 | 0 | 0 |    |
| 0   |        | 23 |   |   | 40 |
| 0   |        | 23 | 1 | 0 |    |
| 2   | 2.83   | 23 | 0 | 0 |    |

|     |        |    |   |   |    |
|-----|--------|----|---|---|----|
| 3   | 3.81   | 23 | 0 | 0 |    |
| 4   | 3.65   | 23 | 0 | 0 |    |
| 5   | 3.92   | 23 | 0 | 0 |    |
| 6   | 3.64   | 23 | 0 | 0 |    |
| 9   | 3.69   | 23 | 0 | 0 |    |
| 12  | 3.69   | 23 | 0 | 0 |    |
| 24  | 2.06   | 23 | 0 | 0 |    |
| 30  | 1.58   | 23 | 0 | 0 |    |
| 48  | 1.14   | 23 | 0 | 0 |    |
| 72  | 0.796  | 23 | 0 | 0 |    |
| 96  | 0.396  | 23 | 0 | 0 |    |
| 168 | 0.176  | 23 | 0 | 0 |    |
| 192 | 0.17   | 23 | 0 | 0 |    |
| 0   |        | 24 |   |   | 40 |
| 0   |        | 24 | 1 | 0 |    |
| 2   | 5.65   | 24 | 0 | 0 |    |
| 3   | 6.03   | 24 | 0 | 0 |    |
| 4   | 6.33   | 24 | 0 | 0 |    |
| 5   | 6.55   | 24 | 0 | 0 |    |
| 6   | 6.51   | 24 | 0 | 0 |    |
| 9   | 5.9    | 24 | 0 | 0 |    |
| 12  | 4.82   | 24 | 0 | 0 |    |
| 24  | 2.56   | 24 | 0 | 0 |    |
| 30  | 1.67   | 24 | 0 | 0 |    |
| 48  | 0.793  | 24 | 0 | 0 |    |
| 72  | 0.537  | 24 | 0 | 0 |    |
| 96  | 0.323  | 24 | 0 | 0 |    |
| 168 |        | 24 | 1 | 0 |    |
| 192 |        | 24 | 1 | 0 |    |
| 0   |        | 25 |   |   | 40 |
| 0   |        | 25 | 1 | 0 |    |
| 2   | 3.48   | 25 | 0 | 0 |    |
| 3   | 3.74   | 25 | 0 | 0 |    |
| 4   | 3.93   | 25 | 0 | 0 |    |
| 5   | 3.91   | 25 | 0 | 0 |    |
| 6   | 4.16   | 25 | 0 | 0 |    |
| 9   | 5.14   | 25 | 0 | 0 |    |
| 12  | 4.14   | 25 | 0 | 0 |    |
| 24  | 2.9    | 25 | 0 | 0 |    |
| 30  | 2.75   | 25 | 0 | 0 |    |
| 48  | 1.44   | 25 | 0 | 0 |    |
| 72  | 0.774  | 25 | 0 | 0 |    |
| 96  | 0.355  | 25 | 0 | 0 |    |
| 168 | 0.0648 | 25 | 0 | 0 |    |
| 192 |        | 25 | 1 | 0 |    |
| 0   |        | 26 |   |   | 40 |
| 0   |        | 26 | 1 | 0 |    |
| 2   | 3.49   | 26 | 0 | 0 |    |
| 3   | 3.78   | 26 | 0 | 0 |    |
| 4   | 3.62   | 26 | 0 | 0 |    |
| 5   | 3.67   | 26 | 0 | 0 |    |
| 6   | 3.43   | 26 | 0 | 0 |    |
| 9   | 3.81   | 26 | 0 | 0 |    |

|     |        |    |   |   |    |
|-----|--------|----|---|---|----|
| 12  | 3.24   | 26 | 0 | 0 |    |
| 24  | 1.79   | 26 | 0 | 0 |    |
| 30  | 1.65   | 26 | 0 | 0 |    |
| 48  | 1.21   | 26 | 0 | 0 |    |
| 72  | 0.919  | 26 | 0 | 0 |    |
| 96  | 0.522  | 26 | 0 | 0 |    |
| 168 | 0.0856 | 26 | 0 | 0 |    |
| 192 |        | 26 | 1 | 0 |    |
| 0   |        | 27 |   |   | 40 |
| 0   |        | 27 | 1 | 0 |    |
| 2   | 4.02   | 27 | 0 | 0 |    |
| 3   | 5.04   | 27 | 0 | 0 |    |
| 4   | 4.77   | 27 | 0 | 0 |    |
| 5   | 4.98   | 27 | 0 | 0 |    |
| 6   | 5.46   | 27 | 0 | 0 |    |
| 9   | 5.16   | 27 | 0 | 0 |    |
| 12  | 4.31   | 27 | 0 | 0 |    |
| 24  | 2.55   | 27 | 0 | 0 |    |
| 30  | 2.15   | 27 | 0 | 0 |    |
| 48  | 0.873  | 27 | 0 | 0 |    |
| 72  | 0.46   | 27 | 0 | 0 |    |
| 96  | 0.256  | 27 | 0 | 0 |    |
| 168 | 0.0648 | 27 | 0 | 0 |    |
| 192 |        | 27 | 1 | 0 |    |
| 0   |        | 28 |   |   | 40 |
| 0   |        | 28 | 1 | 0 |    |
| 2   | 3.37   | 28 | 0 | 0 |    |
| 3   | 4.63   | 28 | 0 | 0 |    |
| 4   | 5.39   | 28 | 0 | 0 |    |
| 5   | 6.34   | 28 | 0 | 0 |    |
| 6   | 5.75   | 28 | 0 | 0 |    |
| 9   | 6.34   | 28 | 0 | 0 |    |
| 12  | 5.39   | 28 | 0 | 0 |    |
| 24  | 3.09   | 28 | 0 | 0 |    |
| 30  | 1.89   | 28 | 0 | 0 |    |
| 48  | 0.981  | 28 | 0 | 0 |    |
| 72  | 0.508  | 28 | 0 | 0 |    |
| 96  | 0.308  | 28 | 0 | 0 |    |
| 168 | 0.0802 | 28 | 0 | 0 |    |
| 192 |        | 28 | 1 | 0 |    |
| 0   |        | 29 |   |   | 40 |
| 0   |        | 29 | 1 | 0 |    |
| 2   | 3.68   | 29 | 0 | 0 |    |
| 3   | 4.84   | 29 | 0 | 0 |    |
| 4   | 4.27   | 29 | 0 | 0 |    |
| 5   | 5.19   | 29 | 0 | 0 |    |
| 6   | 5.79   | 29 | 0 | 0 |    |
| 9   | 5.39   | 29 | 0 | 0 |    |
| 12  | 4.63   | 29 | 0 | 0 |    |
| 24  | 2.61   | 29 | 0 | 0 |    |
| 30  | 2.05   | 29 | 0 | 0 |    |
| 48  | 1.22   | 29 | 0 | 0 |    |
| 72  | 0.591  | 29 | 0 | 0 |    |

|     |        |    |   |   |    |
|-----|--------|----|---|---|----|
| 96  | 0.273  | 29 | 0 | 0 |    |
| 168 |        | 29 | 1 | 0 |    |
| 192 |        | 29 | 1 | 0 |    |
| 0   |        | 30 |   |   | 40 |
| 0   |        | 30 | 1 | 0 |    |
| 2   | 4.69   | 30 | 0 | 0 |    |
| 3   | 5.21   | 30 | 0 | 0 |    |
| 4   | 5.57   | 30 | 0 | 0 |    |
| 5   | 5.41   | 30 | 0 | 0 |    |
| 6   | 5.83   | 30 | 0 | 0 |    |
| 9   | 5.61   | 30 | 0 | 0 |    |
| 12  | 4.98   | 30 | 0 | 0 |    |
| 24  | 3.37   | 30 | 0 | 0 |    |
| 30  | 2.9    | 30 | 0 | 0 |    |
| 48  | 1.27   | 30 | 0 | 0 |    |
| 72  | 1.06   | 30 | 0 | 0 |    |
| 96  | 0.298  | 30 | 0 | 0 |    |
| 168 | 0.0522 | 30 | 0 | 0 |    |
| 192 |        | 30 | 1 | 0 |    |
| 0   |        | 31 |   |   | 40 |
| 0   |        | 31 | 1 | 0 |    |
| 2   | 3.1    | 31 | 0 | 0 |    |
| 3   | 3.51   | 31 | 0 | 0 |    |
| 4   | 4      | 31 | 0 | 0 |    |
| 5   | 3.77   | 31 | 0 | 0 |    |
| 6   | 3.83   | 31 | 0 | 0 |    |
| 9   | 4.47   | 31 | 0 | 0 |    |
| 12  | 3.11   | 31 | 0 | 0 |    |
| 24  | 2.29   | 31 | 0 | 0 |    |
| 30  | 2.08   | 31 | 0 | 0 |    |
| 48  | 0.597  | 31 | 0 | 0 |    |
| 72  | 0.373  | 31 | 0 | 0 |    |
| 96  | 0.175  | 31 | 0 | 0 |    |
| 168 | 0.0764 | 31 | 0 | 0 |    |
| 192 |        | 31 | 1 | 0 |    |
| 0   |        | 32 |   |   | 40 |
| 0   |        | 32 | 1 | 0 |    |
| 2   | 3.68   | 32 | 0 | 0 |    |
| 3   | 4.18   | 32 | 0 | 0 |    |
| 4   | 4.49   | 32 | 0 | 0 |    |
| 5   | 3.85   | 32 | 0 | 0 |    |
| 6   | 5.08   | 32 | 0 | 0 |    |
| 9   | 5.19   | 32 | 0 | 0 |    |
| 12  | 4.68   | 32 | 0 | 0 |    |
| 24  | 2.69   | 32 | 0 | 0 |    |
| 30  | 2.14   | 32 | 0 | 0 |    |
| 48  | 1.04   | 32 | 0 | 0 |    |
| 72  | 0.448  | 32 | 0 | 0 |    |
| 96  | 0.207  | 32 | 0 | 0 |    |
| 168 | 0.0504 | 32 | 0 | 0 |    |
| 192 |        | 32 | 1 | 0 |    |
| 0   |        | 33 |   |   | 40 |
| 0   |        | 33 | 1 | 0 |    |

|     |        |    |   |   |    |
|-----|--------|----|---|---|----|
| 2   | 3.59   | 33 | 0 | 0 |    |
| 3   | 4.22   | 33 | 0 | 0 |    |
| 4   | 4.83   | 33 | 0 | 0 |    |
| 5   | 4.18   | 33 | 0 | 0 |    |
| 6   | 4.66   | 33 | 0 | 0 |    |
| 9   | 4.25   | 33 | 0 | 0 |    |
| 12  | 3.63   | 33 | 0 | 0 |    |
| 24  | 2.96   | 33 | 0 | 0 |    |
| 30  | 2.13   | 33 | 0 | 0 |    |
| 48  | 1.28   | 33 | 0 | 0 |    |
| 72  | 0.653  | 33 | 0 | 0 |    |
| 96  | 0.36   | 33 | 0 | 0 |    |
| 168 | 0.114  | 33 | 0 | 0 |    |
| 192 | 0.096  | 33 | 0 | 0 |    |
| 0   |        | 34 |   |   | 40 |
| 0   |        | 34 | 1 | 0 |    |
| 2   | 5.44   | 34 | 0 | 0 |    |
| 3   | 3.81   | 34 | 0 | 0 |    |
| 4   | 2.49   | 34 | 0 | 0 |    |
| 5   | 3      | 34 | 0 | 0 |    |
| 6   | 2.89   | 34 | 0 | 0 |    |
| 9   | 2.85   | 34 | 0 | 0 |    |
| 12  | 3.51   | 34 | 0 | 0 |    |
| 24  | 1.68   | 34 | 0 | 0 |    |
| 30  | 1.28   | 34 | 0 | 0 |    |
| 48  | 0.904  | 34 | 0 | 0 |    |
| 72  | 0.83   | 34 | 0 | 0 |    |
| 96  | 0.546  | 34 | 0 | 0 |    |
| 168 | 0.246  | 34 | 0 | 0 |    |
| 192 | 0.24   | 34 | 0 | 0 |    |
| 0   |        | 35 |   |   | 40 |
| 0   |        | 35 | 1 | 0 |    |
| 2   | 4.24   | 35 | 0 | 0 |    |
| 3   | 4.64   | 35 | 0 | 0 |    |
| 4   | 5.13   | 35 | 0 | 0 |    |
| 5   | 6.22   | 35 | 0 | 0 |    |
| 6   | 5.12   | 35 | 0 | 0 |    |
| 9   | 5.7    | 35 | 0 | 0 |    |
| 12  | 3.86   | 35 | 0 | 0 |    |
| 24  | 2.35   | 35 | 0 | 0 |    |
| 30  | 1.82   | 35 | 0 | 0 |    |
| 48  | 0.936  | 35 | 0 | 0 |    |
| 72  | 0.583  | 35 | 0 | 0 |    |
| 96  | 0.281  | 35 | 0 | 0 |    |
| 168 | 0.1    | 35 | 0 | 0 |    |
| 192 | 0.0587 | 35 | 0 | 0 |    |
| 0   |        | 36 |   |   | 40 |
| 0   |        | 36 | 1 | 0 |    |
| 2   | 5.66   | 36 | 0 | 0 |    |
| 3   | 5.97   | 36 | 0 | 0 |    |
| 4   | 6      | 36 | 0 | 0 |    |
| 5   | 6.99   | 36 | 0 | 0 |    |
| 6   | 6.47   | 36 | 0 | 0 |    |

|     |        |    |   |   |    |
|-----|--------|----|---|---|----|
| 9   | 6.78   | 36 | 0 | 0 |    |
| 12  | 7.26   | 36 | 0 | 0 |    |
| 24  | 3.24   | 36 | 0 | 0 |    |
| 30  | 1.13   | 36 | 0 | 0 |    |
| 48  | 0.814  | 36 | 0 | 0 |    |
| 72  | 0.343  | 36 | 0 | 0 |    |
| 96  | 0.203  | 36 | 0 | 0 |    |
| 168 | 0.0629 | 36 | 0 | 0 |    |
| 192 |        | 36 | 1 | 0 |    |
| 0   |        | 37 |   |   | 40 |
| 0   |        | 37 | 1 | 0 |    |
| 2   | 4.21   | 37 | 0 | 0 |    |
| 3   | 4.86   | 37 | 0 | 0 |    |
| 4   | 5.49   | 37 | 0 | 0 |    |
| 5   | 5.37   | 37 | 0 | 0 |    |
| 6   | 6.12   | 37 | 0 | 0 |    |
| 9   | 6.48   | 37 | 0 | 0 |    |
| 12  | 4.7    | 37 | 0 | 0 |    |
| 24  | 3.06   | 37 | 0 | 0 |    |
| 30  | 1.86   | 37 | 0 | 0 |    |
| 48  | 0.87   | 37 | 0 | 0 |    |
| 72  | 0.436  | 37 | 0 | 0 |    |
| 96  | 0.253  | 37 | 0 | 0 |    |
| 168 | 0.0585 | 37 | 0 | 0 |    |
| 192 | 0.0838 | 37 | 0 | 0 |    |
| 0   |        | 38 |   |   | 40 |
| 0   |        | 38 | 1 | 0 |    |
| 2   | 4.62   | 38 | 0 | 0 |    |
| 3   | 4.98   | 38 | 0 | 0 |    |
| 4   | 4.55   | 38 | 0 | 0 |    |
| 5   | 5.6    | 38 | 0 | 0 |    |
| 6   | 5.47   | 38 | 0 | 0 |    |
| 9   | 3.86   | 38 | 0 | 0 |    |
| 12  | 4.73   | 38 | 0 | 0 |    |
| 24  | 2.6    | 38 | 0 | 0 |    |
| 30  | 1.65   | 38 | 0 | 0 |    |
| 48  | 1.14   | 38 | 0 | 0 |    |
| 72  | 0.625  | 38 | 0 | 0 |    |
| 96  | 0.3    | 38 | 0 | 0 |    |
| 168 | 0.0592 | 38 | 0 | 0 |    |
| 192 | 0.0528 | 38 | 0 | 0 |    |
| 0   |        | 39 |   |   | 40 |
| 0   |        | 39 | 1 | 0 |    |
| 2   | 3.34   | 39 | 0 | 0 |    |
| 3   | 3.37   | 39 | 0 | 0 |    |
| 4   | 3.61   | 39 | 0 | 0 |    |
| 5   | 3.6    | 39 | 0 | 0 |    |
| 6   | 3.52   | 39 | 0 | 0 |    |
| 9   | 3.7    | 39 | 0 | 0 |    |
| 12  | 3.49   | 39 | 0 | 0 |    |
| 24  | 1.89   | 39 | 0 | 0 |    |
| 30  | 1.57   | 39 | 0 | 0 |    |
| 48  | 0.724  | 39 | 0 | 0 |    |

|     |        |    |   |   |    |
|-----|--------|----|---|---|----|
| 72  | 0.524  | 39 | 0 | 0 |    |
| 96  | 0.257  | 39 | 0 | 0 |    |
| 168 | 0.171  | 39 | 0 | 0 |    |
| 192 | 0.073  | 39 | 0 | 0 |    |
| 0   |        | 40 |   |   | 40 |
| 0   |        | 40 | 1 | 0 |    |
| 2   | 3.83   | 40 | 0 | 0 |    |
| 3   | 3.66   | 40 | 0 | 0 |    |
| 4   | 3.81   | 40 | 0 | 0 |    |
| 5   | 3.73   | 40 | 0 | 0 |    |
| 6   | 3.7    | 40 | 0 | 0 |    |
| 9   | 4.51   | 40 | 0 | 0 |    |
| 12  | 2.55   | 40 | 0 | 0 |    |
| 24  | 1.72   | 40 | 0 | 0 |    |
| 30  | 1.41   | 40 | 0 | 0 |    |
| 48  | 0.978  | 40 | 0 | 0 |    |
| 72  | 0.662  | 40 | 0 | 0 |    |
| 96  | 0.455  | 40 | 0 | 0 |    |
| 168 | 0.169  | 40 | 0 | 0 |    |
| 192 | 0.152  | 40 | 0 | 0 |    |
| 0   |        | 41 |   |   | 40 |
| 0   |        | 41 | 1 | 0 |    |
| 2   | 3.82   | 41 | 0 | 0 |    |
| 3   | 4.04   | 41 | 0 | 0 |    |
| 4   | 3.56   | 41 | 0 | 0 |    |
| 5   | 3.87   | 41 | 0 | 0 |    |
| 6   | 3.82   | 41 | 0 | 0 |    |
| 9   | 4.13   | 41 | 0 | 0 |    |
| 12  | 3.72   | 41 | 0 | 0 |    |
| 24  | 2.35   | 41 | 0 | 0 |    |
| 30  | 2      | 41 | 0 | 0 |    |
| 48  | 1.04   | 41 | 0 | 0 |    |
| 72  | 0.608  | 41 | 0 | 0 |    |
| 96  | 0.0799 | 41 | 0 | 0 |    |
| 168 | 0.106  | 41 | 0 | 0 |    |
| 192 | 0.337  | 41 | 0 | 0 |    |
| 0   |        | 42 |   |   | 40 |
| 0   |        | 42 | 1 | 0 |    |
| 2   | 4.62   | 42 | 0 | 0 |    |
| 3   | 4.73   | 42 | 0 | 0 |    |
| 4   | 4.62   | 42 | 0 | 0 |    |
| 5   | 3.85   | 42 | 0 | 0 |    |
| 6   | 4.09   | 42 | 0 | 0 |    |
| 9   | 5.19   | 42 | 0 | 0 |    |
| 12  | 3.94   | 42 | 0 | 0 |    |
| 24  | 2.03   | 42 | 0 | 0 |    |
| 30  | 1.57   | 42 | 0 | 0 |    |
| 48  | 0.909  | 42 | 0 | 0 |    |
| 72  | 0.534  | 42 | 0 | 0 |    |
| 96  | 0.201  | 42 | 0 | 0 |    |
| 168 | 0.112  | 42 | 0 | 0 |    |
| 192 | 0.133  | 42 | 0 | 0 |    |
| 0   |        | 43 |   |   | 40 |

|     |        |    |   |   |    |
|-----|--------|----|---|---|----|
| 0   |        | 43 | 1 | 0 |    |
| 2   | 4.21   | 43 | 0 | 0 |    |
| 3   | 7.46   | 43 | 0 | 0 |    |
| 4   | 6.69   | 43 | 0 | 0 |    |
| 5   | 4.92   | 43 | 0 | 0 |    |
| 6   | 6.67   | 43 | 0 | 0 |    |
| 9   | 4.95   | 43 | 0 | 0 |    |
| 12  | 5.89   | 43 | 0 | 0 |    |
| 24  | 2.04   | 43 | 0 | 0 |    |
| 30  | 2.1    | 43 | 0 | 0 |    |
| 48  | 1.1    | 43 | 0 | 0 |    |
| 72  | 0.588  | 43 | 0 | 0 |    |
| 96  | 0.26   | 43 | 0 | 0 |    |
| 168 | 0.0732 | 43 | 0 | 0 |    |
| 192 | 0.0632 | 43 | 0 | 0 |    |
| 0   |        | 44 |   |   | 40 |
| 0   |        | 44 | 1 | 0 |    |
| 2   | 3.48   | 44 | 0 | 0 |    |
| 3   | 3.47   | 44 | 0 | 0 |    |
| 4   | 3.91   | 44 | 0 | 0 |    |
| 5   | 4.2    | 44 | 0 | 0 |    |
| 6   | 4.31   | 44 | 0 | 0 |    |
| 9   | 3.7    | 44 | 0 | 0 |    |
| 12  | 3.25   | 44 | 0 | 0 |    |
| 24  | 1.81   | 44 | 0 | 0 |    |
| 30  | 1.44   | 44 | 0 | 0 |    |
| 48  | 0.734  | 44 | 0 | 0 |    |
| 72  | 0.522  | 44 | 0 | 0 |    |
| 96  | 0.341  | 44 | 0 | 0 |    |
| 168 | 0.124  | 44 | 0 | 0 |    |
| 192 | 0.0938 | 44 | 0 | 0 |    |
| 0   |        | 45 |   |   | 40 |
| 0   |        | 45 | 1 | 0 |    |
| 2   | 3.06   | 45 | 0 | 0 |    |
| 3   | 4.03   | 45 | 0 | 0 |    |
| 4   | 4.04   | 45 | 0 | 0 |    |
| 5   | 3.8    | 45 | 0 | 0 |    |
| 6   | 4.82   | 45 | 0 | 0 |    |
| 9   | 3.27   | 45 | 0 | 0 |    |
| 12  | 3.09   | 45 | 0 | 0 |    |
| 24  | 1.83   | 45 | 0 | 0 |    |
| 30  | 1.38   | 45 | 0 | 0 |    |
| 48  | 0.809  | 45 | 0 | 0 |    |
| 72  | 0.522  | 45 | 0 | 0 |    |
| 96  | 0.338  | 45 | 0 | 0 |    |
| 168 | 0.153  | 45 | 0 | 0 |    |
| 192 | 0.161  | 45 | 0 | 0 |    |
| 0   |        | 46 |   |   | 40 |
| 0   |        | 46 | 1 | 0 |    |
| 2   | 1.53   | 46 | 0 | 0 |    |
| 3   | 5.49   | 46 | 0 | 0 |    |
| 4   | 4.89   | 46 | 0 | 0 |    |
| 5   | 4.63   | 46 | 0 | 0 |    |



|     |        |    |   |   |    |
|-----|--------|----|---|---|----|
| 6   | 4.37   | 46 | 0 | 0 |    |
| 9   | 3.32   | 46 | 0 | 0 |    |
| 12  | 3.14   | 46 | 0 | 0 |    |
| 24  | 1.59   | 46 | 0 | 0 |    |
| 30  | 1.72   | 46 | 0 | 0 |    |
| 48  | 0.845  | 46 | 0 | 0 |    |
| 72  | 0.593  | 46 | 0 | 0 |    |
| 96  | 0.249  | 46 | 0 | 0 |    |
| 168 | 0.166  | 46 | 0 | 0 |    |
| 192 | 0.132  | 46 | 0 | 0 |    |
| 0   |        | 47 |   |   | 40 |
| 0   |        | 47 | 1 | 0 |    |
| 2   | 6.05   | 47 | 0 | 0 |    |
| 3   | 6.45   | 47 | 0 | 0 |    |
| 4   | 7.07   | 47 | 0 | 0 |    |
| 5   | 9.17   | 47 | 0 | 0 |    |
| 6   | 11.2   | 47 | 0 | 0 |    |
| 9   | 6.19   | 47 | 0 | 0 |    |
| 12  | 4.74   | 47 | 0 | 0 |    |
| 24  | 2.27   | 47 | 0 | 0 |    |
| 30  | 1.72   | 47 | 0 | 0 |    |
| 48  | 1.34   | 47 | 0 | 0 |    |
| 72  | 0.853  | 47 | 0 | 0 |    |
| 96  | 0.556  | 47 | 0 | 0 |    |
| 168 | 0.161  | 47 | 0 | 0 |    |
| 192 |        | 47 | 1 | 0 |    |
| 0   |        | 48 |   |   | 40 |
| 0   |        | 48 | 0 | 0 |    |
| 2   | 4.34   | 48 | 0 | 0 |    |
| 3   | 6.48   | 48 | 0 | 0 |    |
| 4   | 6.17   | 48 | 0 | 0 |    |
| 5   | 4.94   | 48 | 0 | 0 |    |
| 6   | 6.57   | 48 | 0 | 0 |    |
| 9   | 5.05   | 48 | 0 | 0 |    |
| 12  | 3.57   | 48 | 0 | 0 |    |
| 24  | 2.62   | 48 | 0 | 0 |    |
| 30  | 2.19   | 48 | 0 | 0 |    |
| 48  | 1.24   | 48 | 0 | 0 |    |
| 72  | 0.731  | 48 | 0 | 0 |    |
| 96  | 0.409  | 48 | 0 | 0 |    |
| 168 | 0.0514 | 48 | 0 | 0 |    |
| 192 |        | 48 | 1 | 0 |    |
| 0   |        | 49 |   |   | 40 |
| 0   |        | 49 | 1 | 0 |    |
| 2   | 6.51   | 49 | 0 | 0 |    |
| 3   | 5.12   | 49 | 0 | 0 |    |
| 4   | 5      | 49 | 0 | 0 |    |
| 5   | 4.94   | 49 | 0 | 0 |    |
| 6   | 6.04   | 49 | 0 | 0 |    |
| 9   | 4.68   | 49 | 0 | 0 |    |
| 12  | 3.71   | 49 | 0 | 0 |    |
| 24  | 2.16   | 49 | 0 | 0 |    |
| 30  | 2.14   | 49 | 0 | 0 |    |

|     |       |    |   |   |
|-----|-------|----|---|---|
| 48  | 1.07  | 49 | 0 | 0 |
| 72  | 0.525 | 49 | 0 | 0 |
| 96  | 0.316 | 49 | 0 | 0 |
| 168 | 0.219 | 49 | 0 | 0 |
| 192 | 0.137 | 49 | 0 | 0 |
| 0   |       | 50 |   |   |
| 0   |       | 50 | 1 | 0 |
| 2   | 2.95  | 50 | 0 | 0 |
| 3   | 3.82  | 50 | 0 | 0 |
| 4   | 3.72  | 50 | 0 | 0 |
| 5   | 4.28  | 50 | 0 | 0 |
| 6   | 5.38  | 50 | 0 | 0 |
| 9   | 3.98  | 50 | 0 | 0 |
| 12  | 3.51  | 50 | 0 | 0 |
| 24  | 2.11  | 50 | 0 | 0 |
| 30  | 1.43  | 50 | 0 | 0 |
| 48  | 0.9   | 50 | 0 | 0 |
| 72  | 0.715 | 50 | 0 | 0 |
| 96  | 0.425 | 50 | 0 | 0 |
| 168 | 0.163 | 50 | 0 | 0 |
| 192 | 0.15  | 50 | 0 | 0 |
